# Supplementary material for: Secretory pathway genes assessed by high-throughput microscopy and synthetic genetic array analysis
Source: Royal Society of Chemistry journal article supplement (doi:10.1039/c1mb05175j), 2011-07-06
Supplement: c1mb05175j.pdf [file c1mb05175j.pdf]

**Table S1: Yeast strains and plasmids used in this study**

| Strain    | Genotype                                                                                                                    | Source                                                          |
|-----------|-----------------------------------------------------------------------------------------------------------------------------|-----------------------------------------------------------------|
| Y7092     | <i>MATα can1Δ::STE2pr-HIS5 lyp1Δ ura3Δ0 leu2Δ0 his3Δ1</i>                                                                   | Boone lab,<br>University of<br>Toronto                          |
| Y9230     | <i>MATα can1Δ::STE2pr-URA3 lyp1Δ ura3Δ0 leu2Δ0 his3Δ1</i>                                                                   | Boone lab,<br>University of<br>Toronto                          |
| yCG192    | <i>MATα can1Δ::STE2pr-HIS5 lyp1Δ ura3Δ0 leu2Δ0 his3Δ1 ire1Δ::natMX4</i>                                                     | This study                                                      |
| yCG215    | <i>MATα can1Δ::STE2pr-URA3 ura3Δ0::NLS-RedStar2-natNT2 leu2Δ0 his3Δ1<br/>met15Δ0</i>                                        | This study                                                      |
| yCG241    | <i>MATα can1Δ::STE2pr-HIS5 lyp1Δ ura3Δ0 leu2Δ0 his3Δ1 hac1Δ::natMX4</i>                                                     | This study                                                      |
| yCG251    | <i>MATα can1Δ::STE2pr-URA3 ura3Δ0::NLS-RedStar2-hphNT1 leu2Δ0 his3Δ1<br/>met15Δ0</i>                                        | This study                                                      |
| yCG253    | <i>MATα can1Δ::STE2pr-URA3 lyp1Δ::mCherry-natMX4 ura3Δ0::NLS-<br/>RedStar2-hphNT1 leu2Δ0 his3Δ1 met15Δ0</i>                 | This study                                                      |
| yCG266    | <i>MATα can1Δ::STE2pr-Sp_HIS5; his3Δ1 leu2Δ0 ura3Δ0 met15Δ::4xUPRE-<br/>GFP-URA3 lyp1Δ::TEF2pr_mCherry-natMX4</i>           | This study                                                      |
| yCG312    | <i>MATα CEN::LEU can1Δ::STE2pr-URA3 lyp1Δ::mCherry-natMX4<br/>ura3Δ0::NLS-RedStar2-hphNT1</i>                               | This study                                                      |
| yCG 321   | <i>MATα MRH1-GFP-HIS3MX6 can1Δ::STE2pr-URA3 lyp1Δ::mCherry-<br/>natMX4 ura3Δ0::NLS-RedStar2-hphNT1 leu2Δ met15Δ0 his3Δ1</i> | This study                                                      |
| P4339     | Plasmid; natMX4                                                                                                             | Tong et al, 2001                                                |
| pMJ002    | Plasmid; mCherry                                                                                                            | David Breslow,<br>University of<br>California, San<br>Francisco |
| pFA6a-hph | Plasmid; hphNT1                                                                                                             | Janke et al, 2004                                               |
| pYM43     | Plasmid; Redstar2 natNT2                                                                                                    | Janke et al, 2004                                               |
| pYM-N19   | Plasmid; natNT2 TEF2pr                                                                                                      | Janke et al, 2004                                               |

**Table SII: Genes negatively epistatic with *IRE1* as a query gene**

| ORF     | GENE        | SESA Score | Genetic interaction by |
|---------|-------------|------------|------------------------|
|         |             |            | tetrad                 |
| YBL082C | ALG3/RHK1   | -0.5153    | SL                     |
| YPL227C | ALG5        | -0.58807   | SL                     |
| YOR002W | ALG6        | -0.56612   | SL                     |
| YOR067C | ALG8        | -0.50898   | SL                     |
| YNL219C | ALG9        | -0.50958   | SL                     |
| YNR030W | ALG12/ECM39 | -0.49693   | SL                     |
| YLR242C | ARV1        | -0.43792   | SL                     |
| YNL259C | ATX1        | -0.04165   | NI                     |
| YPL069C | BTS1        | -0.13992   | ND                     |
| YGR157W | CHO2        | -0.14417   | NI                     |
| YLR087C | CSF1        | -0.58620   | SSL                    |
| YMR264W | CUE1        | -0.54903   | SL                     |
| YGR227W | DIE2        | -0.50556   | SL                     |
| YNL080C | EOS1        | -0.26267   | SL                     |
| YDR414C | ERD1        | -0.27198   | SSL                    |
| YJR054W | ERM6        | -0.12261   | ND                     |
| YGL054C | ERV14       | -0.38737   | NI                     |
| YML012W | ERV25       | -0.33518   | SSL                    |
| YGR284C | ERV29       | -0.09176   | NI                     |
| YBR041W | FAT1        | -0.06392   | SSL                    |
| YOL013C | HRD1        | -0.46648   | SL                     |
| YLR207W | HRD3        | -0.37837   | SL                     |
| YIL090W | ICE2        | -0.22327   | NI                     |
| YJR118C | ILM1        | -0.43344   | NI                     |
| YDR123C | INO2        | -0.06872   | NI                     |
| YOL108C | INO4        | -0.21090   | NI                     |
| YNL322C | KRE1        | -0.07092   | NI                     |
| YJL062W | LAS21       | -0.41616   | SSL                    |
| YKL073W | LHS1        | -0.52158   | SL                     |

|           |           |          |     |
|-----------|-----------|----------|-----|
| YIR033W   | MGA2      | -0.14475 | NI  |
| YGL136C   | MRM2      | -0.10622 | ND  |
| YJR073C   | OPI3      | -0.47901 | NI  |
| YOR085W   | OST3      | -0.53328 | SL  |
| YDL232W   | OST4      | -0.42975 | NI  |
| YGL226C-A | OST5      | -0.13472 | SL  |
| YCR044C   | PER1      | -0.25242 | NI  |
| YOL001W   | PHO80     | -0.39188 | SSL |
| YAL023C   | PMT2      | -0.44881 | SSL |
| YNL169C   | PSD1      | -0.38584 | ND  |
| YMR201C   | RAD14     | -0.09608 | SSL |
| YCL001W   | RER1      | -0.11307 | ND  |
| YDL020C   | RPN4      | -0.49929 | SL  |
| YKL212W   | SAC1      | -0.18441 | NI  |
| YMR214W   | SCJ1      | -0.48491 | SSL |
| YBR171W   | SEC66     | -0.45898 | SL  |
| YOL031C   | SIL1      | -0.20836 | SSL |
| YOR154W   | SLP1      | -0.01222 | ND  |
| YML055W   | SPC2      | -0.59309 | SL  |
| YJR117W   | STE24     | -0.50635 | SL  |
| YIL039W   | TED1      | -0.04067 | ND  |
| YBR082C   | UBC4      | -0.36349 | NI  |
| YMR022W   | UBC7/QRI8 | -0.55025 | SL  |
| YML013W   | UBX2/SEL1 | -0.52930 | SL  |
| YML029W   | USA1      | -0.23973 | NI  |
| YGR105W   | VMA21     | -0.11099 | ND  |
| YLR346C   |           | -0.46639 | NI  |

---

Tetrad Analysis; SL=synthetic lethal; SSL=synthetic sick; NI=no interaction; ND=not determined

**Table SIII: Genes negatively epistatic with *HAC1* as a query gene**

| ORF     | GENE        | SESA Score |
|---------|-------------|------------|
| YBL082C | ALG3/RHK1   | -0.40976   |
| YPL227C | ALG5        | -0.57687   |
| YOR002W | ALG6        | -0.56211   |
| YOR067C | ALG8        | -0.53580   |
| YNL219C | ALG9        | -0.42172   |
| YNR030W | ALG12/ECM39 | -0.53039   |
| YLR242C | ARV1        | -0.45570   |
| YNL275W | BOR1        | -0.07301   |
| YPL069C | BTS1        | -0.10034   |
| YLR062C | BUD28       | -0.09233   |
| YGR157W | CHO2        | -0.09136   |
| YLR087C | CSF1        | -0.60154   |
| YMR264W | CUE1        | -0.50142   |
| YGR092W | DBF2        | -0.06769   |
| YBR201W | DER1        | -0.03397   |
| YGR227W | DIE2        | -0.46141   |
| YNL080C | EOS1        | -0.22353   |
| YDR414C | ERD1        | -0.18519   |
| YGL054C | ERV14       | -0.19788   |
| YML012W | ERV25       | -0.29462   |
| YGR284C | ERV29       | -0.04990   |
| YBR041W | FAT1        | -0.02386   |
| YNL274C | GOR1        | -0.19229   |
| YOL013C | HRD1        | -0.44479   |
| YLR207W | HRD3        | -0.29978   |
| YIL090W | ICE2        | -0.18522   |
| YJR118C | ILM1        | -0.33541   |
| YDR123C | INO2        | -0.08561   |
| YOL108C | INO4        | -0.23215   |
| YNL322C | KRE1        | -0.03476   |

|           |           |          |
|-----------|-----------|----------|
| YJL062W   | LAS21     | -0.29362 |
| YKL073W   | LHS1      | -0.50670 |
| YLR104W   | LCL2      | -0.07108 |
| YIR033W   | MGA2      | -0.11734 |
| YJR073C   | OPI3      | -0.47489 |
| YOR085W   | OST3      | -0.53988 |
| YDL232W   | OST4      | -0.41983 |
| YGL226C-A | OST5      | -0.01659 |
| YCR044C   | PER1      | -0.19100 |
| YOL001W   | PHO80     | -0.33921 |
| YAL023C   | PMT2      | -0.40223 |
| YNL169C   | PSD1      | -0.33891 |
| YMR022W   | UBC7/QRI8 | -0.52816 |
| YGL147C   | RPL9A     | -0.07853 |
| YDL020C   | RPN4      | -0.27814 |
| YKL212W   | SAC1      | -0.05150 |
| YDR159W   | SAC3      | -0.21699 |
| YMR214W   | SCJ1      | -0.43950 |
| YBR171W   | SEC66     | -0.24270 |
| YML013W   | SEL1/UBX2 | -0.50304 |
| YOL031C   | SIL1      | -0.09694 |
| YML055W   | SPC2      | -0.58049 |
| YHL007C   | STE20     | -0.04567 |
| YJR117W   | STE24     | -0.50816 |
| YDR126W   | SWF1      | -0.15695 |
| YIL039W   | TED1      | -0.04345 |
| YBR082C   | UBC4      | -0.39076 |
| YML029W   | USA1      | -0.20885 |
| YGR105W   | VMA21     | -0.11086 |
| YLR262C   | YPT6      | -0.01033 |

---

**Table SIV: Genes compensating tunicamycin stress in absence of *IRE1* or *HAC1***

|         | <b>TM &amp; <i>ire1Δ</i></b> | <b>TM &amp; <i>hac1Δ</i></b> | <b>FUNCTION</b>                       |
|---------|------------------------------|------------------------------|---------------------------------------|
| YKL207W |                              | AIM27/EMC3                   | Protein folding ER                    |
| YJR032W | CPR7                         |                              | Peptide prolyl-transisomerase         |
| YGR092W | DBF2                         |                              | Cell cycle stress response            |
| YCL045C |                              | EMC1                         | Protein folding ER                    |
| YGL231C |                              | EMC4                         | Protein folding ER                    |
| YFR041C |                              | ERJ5                         | Protein folding ER                    |
| YOR246C |                              | ENV9                         | Redox vacuole-endosome                |
| YER083C |                              | GET2                         | Golgi ER retrograde                   |
| YIL027C |                              | KRE27/EMC5                   | Protein folding ER                    |
| YOL064C |                              | MET22                        | Methionine biosynth                   |
| YGL167C |                              | PMR1                         | Ca <sup>2+</sup> ATPase Golgi sorting |
| YER120W |                              | SCS2                         | ER Phospholipid synthesis             |
| YGL126W |                              | SCS3                         | Insositol prototrophy                 |
| YLR268W |                              | SEC22                        | Golgi ER retrograde                   |
| YIL076W |                              | SEC28                        | Golgi ER retrograde                   |
| YKL184W | SPE1                         |                              | Ornithine decarboxylase               |
| YOR242C |                              | SSP2                         | Sporulation & mitosis                 |
| YHL007C | STE20                        |                              | Signal transduction kinase            |
| YBR061C |                              | TRM7                         | tRNA methyl transferase               |
| YGL212W | VAM7/VPS43                   |                              | Vacuolar SNARE complex                |
| YOL095C |                              | HMI1                         | Mitochondrial DNA helicase            |
| YGL115W |                              | SNF4                         |                                       |
| YPL212W | ALG5                         |                              |                                       |

**Table SV: Genes compensating DTT stress in absence of *IRE1* or *HAC1***

|           | <b>DTT &amp; <i>ire1Δ</i></b> | <b>DTT &amp; <i>hac1Δ</i></b> | <b>FUNCTION</b>              |
|-----------|-------------------------------|-------------------------------|------------------------------|
| YAL058W   | CNE1                          | CNE1                          | Protein folding ER           |
| YGL027C   |                               | CWH41                         | ER processing glycosidase    |
| YCR017C   |                               | CWH43                         | Cell wall biogenesis         |
| YGR092W   | DBF2                          |                               | Cell cycle stress response   |
| YMR202W   | ERG2                          | ERG2                          | Ergosterol biosynth          |
| YLR056W   | ERG3                          |                               | Ergosterol biosynth          |
| YFR041C   |                               | ERJ5                          | Protein folding ER           |
| YAR002C-A |                               | ERP1                          | ER Golgi anterograde         |
| YNL323W   |                               | LEM3                          | ER Phospholipid synth        |
| YCL001W   |                               | RER1                          | Golgi ER retrograde          |
| YBR229C   | ROT2                          | ROT2                          | ER processing glycosidase    |
| YGL126W   | SCS3                          | SCS3                          | Inositol prototrophy         |
| YLR268W   | SEC22                         | SEC22                         | Golgi ER retrograde          |
| YIL076W   |                               | SEC28                         | Golgi ER retrograde          |
| YDR477W   | SNF1                          |                               | Ser/Thr protein kinase       |
| YGL115W   | SNF4                          |                               | AMP-activated protein kinase |
| YJR010C-A | SPC1                          | SPC1                          | Signal peptidase             |
| YIL047C   | SYG1                          |                               | Unknown plasma membrane      |
| YGL115W   |                               | SNF4                          |                              |
| YOL052C   |                               | SPE2                          |                              |
| YKL184W   | SPE1                          |                               |                              |
| YNL064C   | YDJ1                          |                               |                              |
| YBR162W   | YSY6                          |                               |                              |

**Table SVI: Primers used in this study**

| Primer | Description                                                | Sequence                                                                                            |
|--------|------------------------------------------------------------|-----------------------------------------------------------------------------------------------------|
| 144    | TEF2pr_NLS forward                                         | TGCGAGGCATATTTATGGTGAAGGATAAGTTT<br>TGACCATCAAGAAGGTTTCGTACGCTGCAGGTC<br>GAC                        |
| 145    | TEF2pr_NLS reverse                                         | CTTTCTCTTTTCTTTGGAGATTCAAATTCAGA<br>ACCATCAGCAGTTCCTTTACCACCAGTCATAGA<br>AGCCATGTCCGGGGGGGATCCACTAG |
| 146    | NLS-Redstar2 forward                                       | GAATTTGAATCTCCAAAGAAAAGAGAAAGGT<br>TGAAGCTTCTGGTTTGGTTCCTAGAGGTTCTGC<br>TTCTTCTGAAGATGTCATC         |
| 147    | NLS-Redstar2 reverse                                       | CCATGAAGCTTTTTCTTTCCAATTTTTTTTTTTT<br>CGTCATTATAGAAATCCGCTGGCCGGGTGACC<br>CGGCGGGGAC                |
| 240    | hph marker switch                                          | CGAGAAAATCTGGAAGAGTAAAAAAGGAGTA<br>GAAACATTTTGAAGCTATGAGCTCCGAGCTCG<br>TTAAAGCCTTCGAG               |
| 224    | mCherry forward                                            | AATTGCATTGTCTATAACGATAACAAAAGACA<br>TCGTATATATATATATATCGTACGCTGCAGGTC<br>GAC                        |
| 252    | mCherry reverse                                            | TCTATTTTTTTATTTTTTCTATTTTGAAGGCAT<br>GCAAGAGGTTCTGTGAACTATAGGGAGACCGG<br>CAGA                       |
| 122    | IRE1 deletion forward primer                               | ATACACATTAAAAAACAGCATATCTGAGGAA<br>TTAATATTTTAGCACTTTGAAAAACATGGAGG<br>CCCAGAATACCCT                |
| 123    | IRE1 deletion reverse primer                               | CAAAGTAACATTAATGCAATAATCAACCAAGA<br>AGAAGCAGAGGGGCATGAACATGCAGTATAG<br>CGACCAGCATTAC                |
| 120    | IRE1 deletion confirmation reverse primer (used with #118) | TGCAGAACGAAAGCTTTCCA                                                                                |
| 121    | IRE1 deletion confirmation forward primer (used with #119) | GGAGATCAATGAGCCAACCT                                                                                |



|     |                                                               |                                                                                  |
|-----|---------------------------------------------------------------|----------------------------------------------------------------------------------|
| 118 | NatR cassette internal confirmation primer                    | TGGCTGGAGGTCACCAACGTC                                                            |
| 119 | NatR cassette internal confirmation primer                    | TACGAGACGACCACGAAGC                                                              |
| 190 | HAC1 deletion forward primer                                  | GTCAAACATAACAACCTCCTCCTCCCCACCTA<br>CGACAACAACCGCCACTACATGGAGGCCAG<br>ATACCCT    |
| 191 | HAC1 deletion reverse primer                                  | AACAGCGATAATAACGAGAAAAAAAAAATTA<br>TACCCTCTTGCGATTGTCTCAGTATAGCGACCA<br>GCATTCAC |
| 188 | HAC1 deletion confirmation forward primer (used<br>with #119) | TGGGCAGCGACACTGAACATA                                                            |
| 189 | HAC1 deletion confirmation reverse primer (used<br>with #118) | ATGAACGTGGTTTTGAACACCT                                                           |
